# Supplementary material for: Development and Evaluation of a Multimodal Supportive Intervention for Promoting Physical Function in Older Patients with Cancer
Source: MDPI journal article supplement (doi:10.3390/cancers14112599), 2022-05-24

## Sitting position

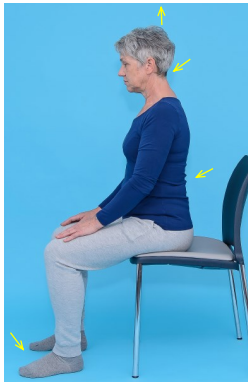

## Posture

## Standing position

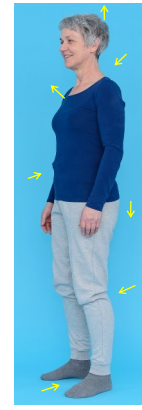

## Exercises

heel raises

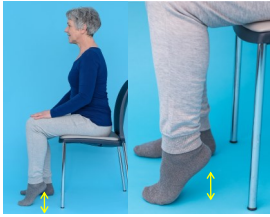

toe raises

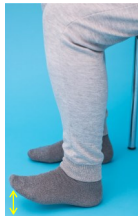

alternate heel/  
toe raises

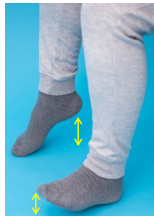

heel raises

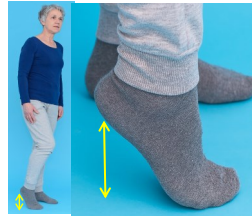

stand on tiptoes

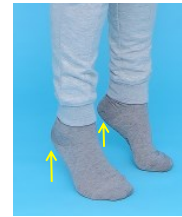

alternate heel raises

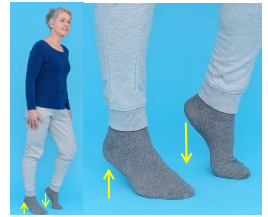

walking in place without and with reciprocal arm swing

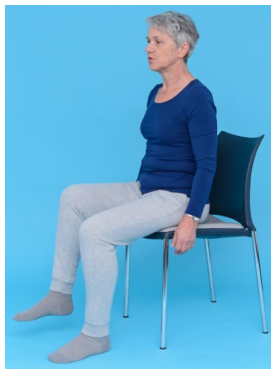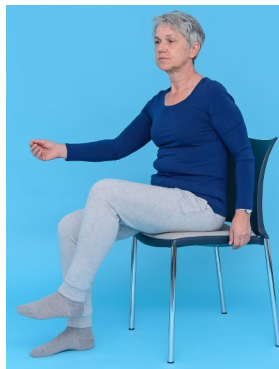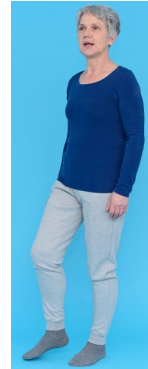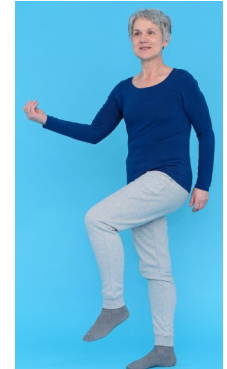

walking in place with reciprocal arm swing and slow turning of the head

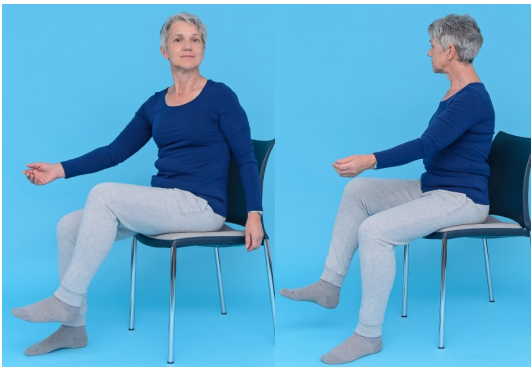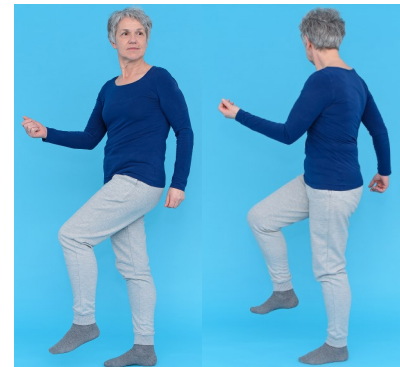

shoulder circles

forward

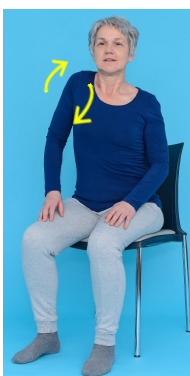

backward

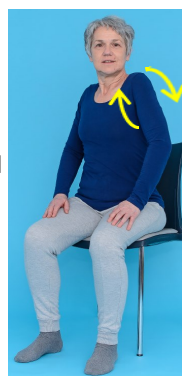

forward

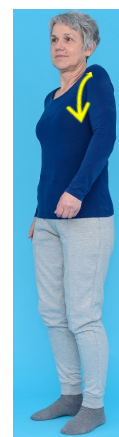

backward

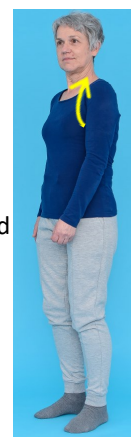

arm raises

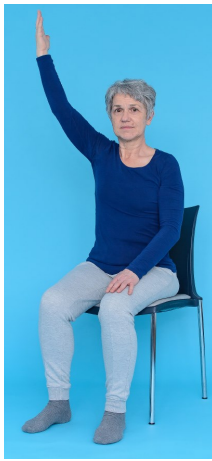

picking apples

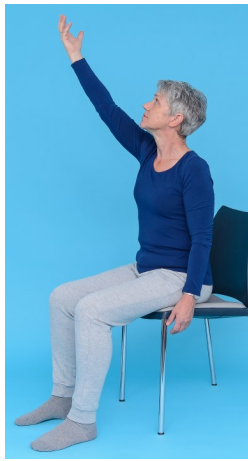

arm raises

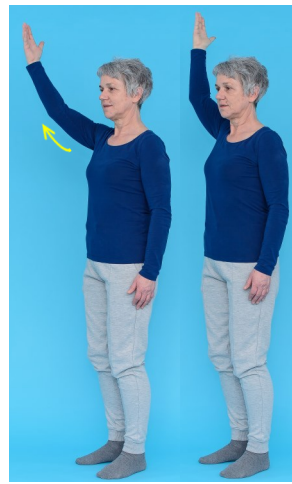

picking apples

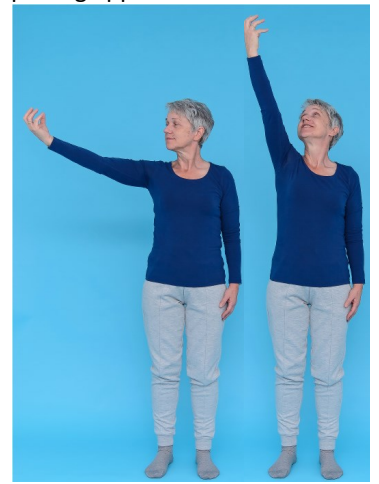

shoulder circles by rotating the elbow

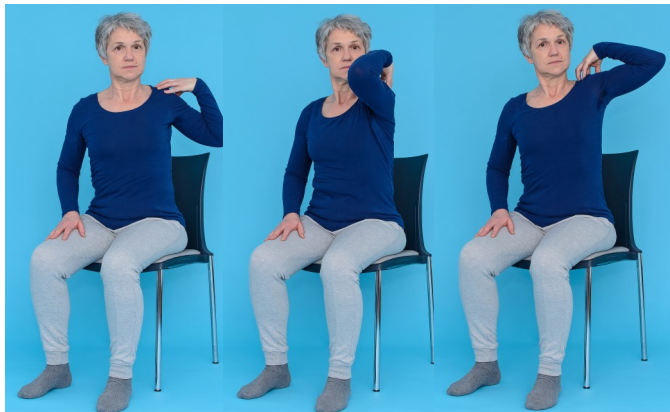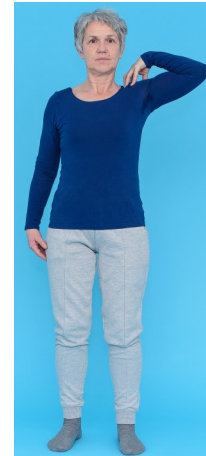

shoulder circles with both arms and trunk movement

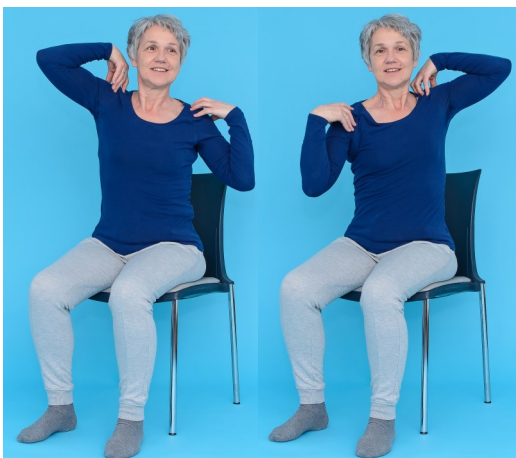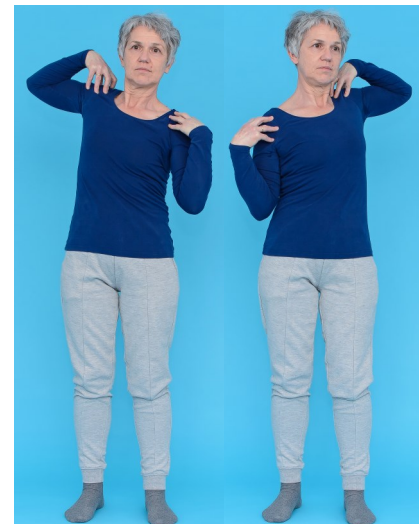

painting circles in the sky

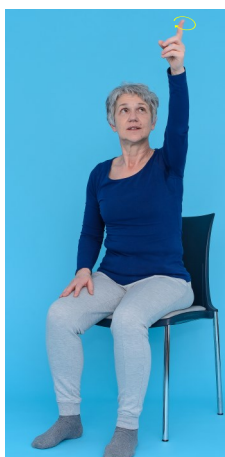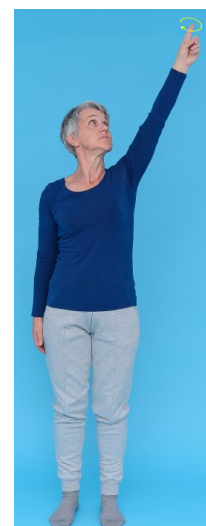

Supplement: s1 [file s1]
