# Supplementary material for: Development and Evaluation of a Multimodal Supportive Intervention for Promoting Physical Function in Older Patients with Cancer
Source: MDPI journal article supplement (doi:10.3390/cancers14112599), 2022-05-24
Supplement: s1 [file s1]

**Table S1:** Assessments of physical performance, activities of daily living, cognition, depression, social situation and physical activity at baseline (T0) and after the intervention (T1) for both study arms DI and PI

|                            |                       | DI T0 |                        | PI T0* |                         | DI T1 |                        | PI T1*# |                        |
|----------------------------|-----------------------|-------|------------------------|--------|-------------------------|-------|------------------------|---------|------------------------|
| Parameter                  | Instrument (Scale)    | N     | MV $\pm$ SD (Min-Max)  | N      | MV $\pm$ SD (Min-Max)   | N     | MV $\pm$ SD (Min-Max)  | N       | MV $\pm$ SD (Min-Max)  |
| Physical performance       | Hand grip (kg) right  | 13    | 30 $\pm$ 8 (16-41)     | 10     | 26 $\pm$ 8 (17-39)      | 12    | 30 $\pm$ 9 (17-43)     | 8       | 25 $\pm$ 7 (18-36)     |
|                            | Hand grip (kg) left   | 13    | 27 $\pm$ 8 (17-41)     | 10     | 26 $\pm$ 5 (20-34)      | 12    | 29 $\pm$ 9 (18-45)     | 8       | 25 $\pm$ 5 (20-36)     |
|                            | TUG (sek)             | 13    | 8 $\pm$ 1 (7-11)       | 10     | 8 $\pm$ 1 (6-11)        | 12    | 7 $\pm$ 2 (5-11)       | 7       | 7 $\pm$ 1 (6-8)        |
|                            | TUG-dual (sec)        | 11    | 10 $\pm$ 2 (7-13)      | 8      | 10 $\pm$ 2 (7-13)       | 11    | 9 $\pm$ 2 (5-11)       | 6       | 9 $\pm$ 1 (7-11)       |
|                            | FTSTS (sec)           | 13    | 11 $\pm$ 3 (6-16)      | 10     | 14 $\pm$ 3 (10-17)      | 12    | 11 $\pm$ 2 (8-15)      | 8       | 13 $\pm$ 3 (10-21)     |
|                            | 6mWT (m)              | 11    | 470 $\pm$ 90 (300-640) | 10     | 397 $\pm$ 101 (270-561) | 8     | 499 $\pm$ 85 (400-640) | 6       | 487 $\pm$ 69 (390-560) |
|                            | 4-Balance Test (sec.) |       | 10 sec aim reached     |        | 10 sec aim reached      |       | 10 sec aim reached     |         | 10 sec aim reached     |
|                            | Both feet             | 13    | 13                     | 10     | 10                      | 12    | 12                     | 9       | 8                      |
|                            | Semi-tandem           | 13    | 13                     | 10     | 10                      | 12    | 12                     | 9       | 8                      |
|                            | Tandem                | 13    | 12                     | 10     | 10                      | 12    | 9                      | 9       | 8                      |
|                            | One foot              | 13    | 10                     | 10     | 9                       | 12    | 9                      | 9       | 7                      |
|                            |                       | N     | MV $\pm$ SD (Min-Max)  | N      | MV $\pm$ SD (Min-Max)   | N     | MV $\pm$ SD (Min-Max)  | N       | MV $\pm$ SD (Min-Max)  |
| Activities of Daily living | ADL Items (0-4)       | 13    | 4 $\pm$ 0 (4-4)        | 11     | 4 $\pm$ 1 (2-4)         | 13    | 4 $\pm$ 0 (3-4)        | 10      | 4 $\pm$ 1 (1-4)        |
|                            | IADL Items (9-0)      | 13    | 9 $\pm$ 0 (8-9)        | 11     | 7 $\pm$ 3 (2-9)         | 13    | 8 $\pm$ 2 (0-9)        | 10      | 7 $\pm$ 3 (1-9)        |
| Cognition                  | MMSE                  | 13    | 28 $\pm$ 2 (25-30)     | 11     | 28 $\pm$ 3 (19-30)      | 11    | 29 $\pm$ 1 (27-30)     | 9       | 29 $\pm$ 1 (26-30)     |
|                            | Clock drawing test    | 12    | 2 $\pm$ 1 (1-3)        | 9      | 2 $\pm$ 1 (1-3)         | 11    | 2 $\pm$ 1 (1-4)        | 8       | 1 $\pm$ 1 (1-3)        |
| Social Situation           | Nikolaus              | 13    | 5 $\pm$ 1 (3-6)        | 11     | 6 $\pm$ 1 (4-6)         | 13    | 5 $\pm$ 1 (2-6)        | 10      | 6 $\pm$ 1 (4-6)        |
| Emotional Status           | PHQ-9                 | 13    | 4 $\pm$ 4 (1-14)       | 11     | 5 $\pm$ 3 (0-9)         | 13    | 6 $\pm$ 5 (0-16)       | 10      | 7 $\pm$ 3 (1-12)       |

\*T0 and T1: one participant was bound to a wheelchair and had limited use of hands

#T1: due to inability to travel to the clinic, two participants were interviewed by telephone

**Table S2:** PASE-Score results (range of the Scale 0-100; recall period 7 days) for the whole sample and for both study arms

|                               |                      | All<br>(nT0=24; nT1=23)<br>M±SD<br>(min-max) | DI<br>(n=13)<br>M±SD<br>(min-max) | PI<br>(nT0=11; nT1=10)<br>M±SD<br>(min-max) |
|-------------------------------|----------------------|----------------------------------------------|-----------------------------------|---------------------------------------------|
| Walking at T0                 |                      | 18.6±17.3<br>(0-85.7)                        | 18.5±10.1<br>(0-25.6)             | 18.8±23.7<br>(2.1±85.7)                     |
| Walking at T1                 |                      | 24.0±15.0<br>(5-51.4)                        | 24.0±17.1<br>(5-51.4)             | 24.0±12.6<br>(6.4-51.4)                     |
| Light activities at T0        |                      | 5.9 ±6.4<br>(0-27.0)                         | 5.5±5.3<br>(0-15.8)               | 6.3±7.8<br>(0-27.0)                         |
| Light activities at T1        |                      | 5.7±4.5<br>(0-15.8)                          | 7.2±4.8<br>(0-15.8)               | 3.8±3.3<br>(0-9.0)                          |
| Moderate activities at T0     |                      | 3.3±7.1<br>(0-29.6)                          | 4.2±8.5<br>(0-29.6)               | 2.2±5.1<br>(0-14.8)                         |
| Moderate activities at T1     |                      | 5.4±12.3<br>(0-59.1)                         | 8.5±15.8<br>(0-59.1)              | 1.3±2.8<br>(0-7.4)                          |
| Vigorous activities at T0     |                      | 2.5±12.1<br>(0-59.1)                         | 4.5±16.4<br>(0-59.1)              | 0                                           |
| Vigorous activities at T1     |                      | 1.4±6.2<br>(0-29.6)                          | 2.5±8.2<br>(0-29.6)               | 0                                           |
| Special Muscle Training at T0 |                      | 0.9±3.2<br>(0-12.9)                          | 1.7±4.3<br>(0-12.9)               | 0                                           |
| Special Muscle Training at T1 |                      | 0.6±2.9<br>(0-12.9)                          | 1.0±3.6<br>(0-12.9)               | 0                                           |
| PASE Score at T0              |                      | 94.8±49.6<br>(4.39-228)                      | 104.3±56.3<br>(42.6-228)          | 83.6±39.9<br>(4.4-139.7)                    |
| PASE Score at T1              |                      | 91.7±48.3<br>(8.8-183.9)                     | 95.9±51.3<br>(10.3-183.9)         | 86.2±46.2<br>(8.6-145.4)                    |
| PASE Score per age groups     |                      |                                              |                                   |                                             |
| 60-64 years old               | PASE Score at T0     | 78.8±42.4                                    | 88.4±64.8                         | 72.5±36.7                                   |
|                               | (n=5; nID=2; nIP=3)  | (36.7-134.2)                                 | (42.6-134.2)                      | (36.7-110.0)                                |
|                               | PASE Score at T1     | 107.6±44.0                                   | 134.8±43.8                        | 89.4±40.9                                   |
|                               | (n=5; nID=2; nIP=3)  | (42.3-165.8)                                 | (103.9-165.8)                     | (42.3-116.0)                                |
| 65-69 years old               | PASE Score at T0     | 118.3±51.8                                   | 120.5±66.9                        | 114.9±23.6                                  |
|                               | (n=10; nID=6; nIP=4) | (54.9-228)                                   | (54.9-228.0)                      | (85.7-139.7)                                |
|                               | PASE Score at T1     | 90.6±53.6                                    | 88.1±51.6                         | 94.4±64.4                                   |
|                               | (n=10; nID=6; nIP=4) | (8.6-183.9)                                  | (45.2-183.9)                      | (8.57-145.4)                                |
| 70-74 years old               | PASE Score at T0     | 59.4±11.9                                    | 61.8±15.7                         | 54.4                                        |
|                               | (n=3; nID=2; nIP=1)  | (50.7-73.0)                                  | (50.7-73.0)                       |                                             |
|                               | PASE Score at T1     | 87.2±66.4                                    | 115.1±64.3                        | 31.4                                        |
|                               | (n=3; nID=2; nIP=1)  | (31.4-160.6)                                 | (69.6-160.6)                      |                                             |
| 75-79 years old               | PASE Score at T0     | 93.7±36.4                                    | 95.2±62.9                         | 92.1±2.7                                    |
|                               | (n=4; nID=2; nIP=2)  | (50.7-139.7)                                 | (50.7-139.7)                      | (90.3-94.0)                                 |
|                               | PASE Score at T1     | 98.1±16.4                                    | 103.9±24.6                        | 92.4±7.9                                    |
|                               | (n=4; nID=2; nIP=2)  | (86.5-121.3)                                 | (86.5-121.3)                      | (86.8-98.0)                                 |
| 80+ years old                 | PASE Score at T0     | 73.1±97.1                                    | 141.7                             | 4.39                                        |
|                               | (n=2; nID=1; nIP=1)  | (4.39-141.7)                                 |                                   |                                             |
|                               | PASE Score at T1     | 10.3                                         | 10.25                             | 0                                           |
|                               | (n=1; nID=1; nIP=0)  |                                              |                                   |                                             |

**Table S3:** Mean values (MV) and Standard Deviations (SD) for all functioning scales and symptom scales of the EORTC QLQ-C30 and EORTC ELD-14 for the whole sample and for participants with available data for all three measurement points (n=19).

| EORTC QLQ-C30        | T0 (n=24)     | T0 (n=19)     | T1 (n=19)               | T2 (n=19)                |
|----------------------|---------------|---------------|-------------------------|--------------------------|
|                      | Mean $\pm$ SD | Mean $\pm$ SD | Mean $\pm$ SD           | Mean $\pm$ SD            |
| Physical Function    | 79 $\pm$ 16   | 78 $\pm$ 16   | 76 $\pm$ 20             | 72 $\pm$ 24              |
| Role Function        | 81 $\pm$ 29   | 82 $\pm$ 30   | 68 $\pm$ 28             | 62 $\pm$ 33*             |
| Cognitive Function   | 85 $\pm$ 19   | 84 $\pm$ 19   | 84 $\pm$ 18             | 79 $\pm$ 23              |
| Emotional Function   | 69 $\pm$ 17   | 67 $\pm$ 17   | 70 $\pm$ 19             | 56 $\pm$ 27              |
| Social Function      | 79 $\pm$ 29   | 79 $\pm$ 30   | 71 $\pm$ 32             | 74 $\pm$ 34              |
| Fatigue              | 39 $\pm$ 25   | 42 $\pm$ 24   | 44 $\pm$ 30             | 55 $\pm$ 27              |
| Pain                 | 30 $\pm$ 32   | 34 $\pm$ 32   | 33 $\pm$ 39             | 50 $\pm$ 33              |
| Nausea               | 9 $\pm$ 15    | 10 $\pm$ 16   | 3 $\pm$ 8               | 6 $\pm$ 11               |
| Dyspnoea             | 39 $\pm$ 36   | 40 $\pm$ 38   | 37 $\pm$ 35             | 37 $\pm$ 44 <sup>#</sup> |
| Sleeplessness        | 37 $\pm$ 33   | 44 $\pm$ 34   | 49 $\pm$ 36             | 63 $\pm$ 35              |
| Loss of Appetite     | 24 $\pm$ 36   | 25 $\pm$ 38   | 28 $\pm$ 37             | 23 $\pm$ 33              |
| Constipation         | 21 $\pm$ 32   | 21 $\pm$ 34   | 14 $\pm$ 32             | 19 $\pm$ 34              |
| Diarrhoea            | 17 $\pm$ 31   | 21 $\pm$ 34   | 9 $\pm$ 19 <sup>§</sup> | 9 $\pm$ 19 <sup>§</sup>  |
| Financial Problems   | 12 $\pm$ 22   | 14 $\pm$ 23   | 10 $\pm$ 19             | 7 $\pm$ 18               |
| Global Health Status | 68 $\pm$ 19   | 66 $\pm$ 19   | 65 $\pm$ 21             | 57 $\pm$ 23              |
| EORTC ELD-14         | T0 (n=24)     | T0 (n=19)     | T1 (n=19)               |                          |
|                      | Mean $\pm$ SD | Mean $\pm$ SD | Mean $\pm$ SD           |                          |
| Mobility             | 28 $\pm$ 27   | 30 $\pm$ 28   | 32 $\pm$ 31             |                          |
| Joint Stiffness      | 32 $\pm$ 30   | 33 $\pm$ 31   | 33 $\pm$ 33             |                          |
| Worries about others | 58 $\pm$ 30   | 63 $\pm$ 27   | 51 $\pm$ 29             |                          |
| Future Worries       | 60 $\pm$ 27   | 63 $\pm$ 29   | 54 $\pm$ 26             |                          |
| Illness Burden       | 60 $\pm$ 25   | 64 $\pm$ 24   | 61 $\pm$ 29             |                          |
| Family Support       | 71 $\pm$ 37   | 74 $\pm$ 36   | 70 $\pm$ 33             |                          |
| Maintaining Purpose  | 80 $\pm$ 20   | 80 $\pm$ 20   | 73 $\pm$ 24             |                          |

\* T2 n=18, <sup>§</sup> T1, T2 n=18, <sup>#</sup> T2 n=17

**Table S4:** Mean values (MV) and Standard Deviations (SD) for all functioning scales and symptom scales of the EORTC QLQ-C30 and EORTC ELD-14 at all measurement time points for both study arms DI and PI

|                      | T0                         |                            | T1                         |                            | T2                         |                           |
|----------------------|----------------------------|----------------------------|----------------------------|----------------------------|----------------------------|---------------------------|
| EORTC QLQ-C30        | DI (n=13)<br>Mean $\pm$ SD | PI (n=11)<br>Mean $\pm$ SD | DI (n=13)<br>Mean $\pm$ SD | PI (n=10)<br>Mean $\pm$ SD | DI (n=10)<br>Mean $\pm$ SD | PI (n=9)<br>Mean $\pm$ SD |
| Physical Function    | 83 $\pm$ 13<br>(60-100)    | 75 $\pm$ 19<br>(40-100)    | 76 $\pm$ 18<br>(40-100)    | 73 $\pm$ 24<br>(33-100)    | 68 $\pm$ 26<br>(20-93)     | 76 $\pm$ 21<br>(33-100)   |
| Role Function        | 88 $\pm$ 22<br>(33-100)    | 71 $\pm$ 34<br>(0-100)     | 70 $\pm$ 31<br>(0-100)     | 68 $\pm$ 25<br>(33-100)    | 57 $\pm$ 36<br>(0-100)     | 69 $\pm$ 29 #<br>(33-100) |
| Cognitive Function   | 87 $\pm$ 19<br>(33-100)    | 82 $\pm$ 19<br>(50-100)    | 79 $\pm$ 18<br>(42-100)    | 83 $\pm$ 17<br>(50-100)    | 77 $\pm$ 25<br>(17-100)    | 82 $\pm$ 23<br>(50-100)   |
| Emotional Function   | 72 $\pm$ 15<br>(50-100)    | 64 $\pm$ 19<br>(42-100)    | 85 $\pm$ 18<br>(42-100)    | 67 $\pm$ 21<br>(42-100)    | 55 $\pm$ 25<br>(0-83)      | 57 $\pm$ 31<br>(0-100)    |
| Social Function      | 81 $\pm$ 28<br>(17-100)    | 76 $\pm$ 31<br>(17-100)    | 69 $\pm$ 37<br>(0-100)     | 77 $\pm$ 23<br>(32-100)    | 72 $\pm$ 37<br>(0-100)     | 76 $\pm$ 33<br>(0-100)    |
| Fatigue              | 34 $\pm$ 22<br>(0-67)      | 44 $\pm$ 28<br>(11-89)     | 37 $\pm$ 26<br>(11-100)    | 47 $\pm$ 32<br>(0-100)     | 57 $\pm$ 27<br>(22-100)    | 52 $\pm$ 29<br>(0-83)     |
| Pain                 | 26 $\pm$ 26<br>(0-67)      | 35 $\pm$ 39<br>(0-100)     | 18 $\pm$ 32<br>(0-100)     | 49 $\pm$ 38<br>(0-100)     | 45 $\pm$ 31<br>(0-100)     | 56 $\pm$ 36<br>(0-100)    |
| Nausea               | 9 $\pm$ 13<br>(0-33)       | 9 $\pm$ 17<br>(0-50)       | 1 $\pm$ 5<br>(0-17)        | 5 $\pm$ 11<br>(0-33)       | 3 $\pm$ 7<br>(0-17)        | 9 $\pm$ 15<br>(0-33)      |
| Dyspnoea             | 36 $\pm$ 35<br>(0-100)     | 42 $\pm$ 40<br>(0-100)     | 33 $\pm$ 33<br>(0-100)     | 37 $\pm$ 37<br>(0-100)     | 52 $\pm$ 44 #<br>(0-100)   | 21 $\pm$ 40<br>(0-100)    |
| Sleeplessness        | 44 $\pm$ 34<br>(0-100)     | 30 $\pm$ 31<br>(0-100)     | 46 $\pm$ 37<br>(0-100)     | 40 $\pm$ 35<br>(0-100)     | 63 $\pm$ 37<br>(0-100)     | 63 $\pm$ 35<br>(0-100)    |
| Loss of Appetite     | 18 $\pm$ 32<br>(0-100)     | 30 $\pm$ 41<br>(0-100)     | 21 $\pm$ 35<br>(0-100)     | 30 $\pm$ 39 #<br>(0-100)   | 27 $\pm$ 41<br>(0-100)     | 18 $\pm$ 24<br>(0-67)     |
| Constipation         | 13 $\pm$ 22<br>(0-67)      | 30 $\pm$ 41<br>(0-100)     | 5 $\pm$ 12<br>(0-35)       | 30 $\pm$ 43<br>(0-100)     | 17 $\pm$ 32<br>(0-100)     | 22 $\pm$ 37<br>(0-100)    |
| Diarrhoea            | 18 $\pm$ 32<br>(0-100)     | 15 $\pm$ 31<br>(0-100)     | 8 $\pm$ 20<br>(0-67)       | 7 $\pm$ 15 #<br>(0-33)     | 10 $\pm$ 16<br>(0-33)      | 8 $\pm$ 24<br>(0-67)      |
| Financial Problems   | 10 $\pm$ 16<br>(0-33)      | 15 $\pm$ 27<br>(0-67)      | 5 $\pm$ 12<br>(0-33)       | 17 $\pm$ 24<br>(0-67)      | 7 $\pm$ 14<br>(0-33)       | 7 $\pm$ 22<br>(0-67)      |
| Global Health Status | 70 $\pm$ 15<br>(50-92)     | 65 $\pm$ 24<br>(33-100)    | 65 $\pm$ 15<br>(42-83)     | 60 $\pm$ 26<br>(33-100)    | 53 $\pm$ 25<br>(0-75)      | 61 $\pm$ 21<br>(33-100)   |

  

|                      | T0                         |                            | T1                         |                            |
|----------------------|----------------------------|----------------------------|----------------------------|----------------------------|
| EORTC ELD-14         | DI (n=13)<br>Mean $\pm$ SD | PI (n=11)<br>Mean $\pm$ SD | DI (n=13)<br>Mean $\pm$ SD | PI (n=10)<br>Mean $\pm$ SD |
| Mobility             | 20 $\pm$ 19<br>(0-56)      | 37 $\pm$ 33<br>(0-100)     | 26 $\pm$ 29<br>(0-78)      | 34 $\pm$ 32<br>(0-78)      |
| Joint Stiffness      | 28 $\pm$ 18<br>(0-67)      | 36 $\pm$ 41<br>(0-100)     | 18 $\pm$ 22<br>(0-67)      | 43 $\pm$ 39<br>(0-100)     |
| Worries about others | 50 $\pm$ 32<br>(0-100)     | 68 $\pm$ 25<br>(33-100)    | 44 $\pm$ 21<br>(11-83)     | 54 $\pm$ 35<br>(0-100)     |
| Future Worries       | 60 $\pm$ 30<br>(0-100)     | 61 $\pm$ 26<br>(22-100)    | 40 $\pm$ 29<br>(11-100)    | 61 $\pm$ 22<br>(22-100)    |
| Illness Burden       | 60 $\pm$ 25<br>(17-100)    | 61 $\pm$ 26<br>(17-100)    | 24 $\pm$ 34<br>(0-100)     | 58 $\pm$ 24<br>(17-100)    |
| Family Support       | 64 $\pm$ 44<br>(0-100)     | 79 $\pm$ 27<br>(33-100)    | 54 $\pm$ 42<br>(0-100)     | 77 $\pm$ 28<br>(33-100)    |
| Maintaining Purpose  | 83 $\pm$ 17<br>(50-100)    | 76 $\pm$ 23<br>(33-100)    | 74 $\pm$ 26<br>(17-100)    | 65 $\pm$ 25<br>(33-100)    |

# one participant did not complete this scale
