# Supplementary material for: Development and Evaluation of a Multimodal Supportive Intervention for Promoting Physical Function in Older Patients with Cancer
Source: MDPI journal article supplement (doi:10.3390/cancers14112599), 2022-05-24
Supplement: s1 [file s1]

# Activity plan for [NAME of the Participant]

Week: \_\_\_\_\_

Figure S1. PA Plan.

|                                    | Day 1                                                             | Day 2                                                  | Day 3                                                             | Day 4                                                  | Day 5                                                             | Day 6                                                  | Day 7      |
|------------------------------------|-------------------------------------------------------------------|--------------------------------------------------------|-------------------------------------------------------------------|--------------------------------------------------------|-------------------------------------------------------------------|--------------------------------------------------------|------------|
| Basic training lower body part     | ✓                                                                 | ✓                                                      | ✓                                                                 | ✓                                                      | ✓                                                                 | ✓                                                      |            |
| Basic training upper body part     | ✓                                                                 | ✓                                                      | ✓                                                                 | ✓                                                      | ✓                                                                 | ✓                                                      |            |
| Specific exercises upper body part | -Exercises with rubber band<br>-Press-ups<br><br>(3x10 reps/each) |                                                        | -Exercises with rubber band<br>-Press-ups<br><br>(3x10 reps/each) |                                                        | -Exercises with rubber band<br>-Press-ups<br><br>(3x10 reps/each) |                                                        | My reward? |
| Specific exercises lower body part |                                                                   | -Knee extension<br>-Elbow knee<br><br>(3x10 reps/each) |                                                                   | -Knee extension<br>-Elbow knee<br><br>(3x10 reps/each) |                                                                   | -Knee extension<br>-Elbow knee<br><br>(3x10 reps/each) |            |
| Walking/Biking                     | ✓                                                                 | ✓                                                      | ✓                                                                 | ✓                                                      | ✓                                                                 | ✓                                                      | ✓          |

This is an example of a physical activity plan for a patient that shows to be independent in everyday activities, has good balance skills and showed a good aerobic capacity in the baseline assessments (measured by six-minute walk Test) .

Figure S2. PA diary.

| My activities  |                                                    | Perceived intensity |          |      | ⌚<br>min. | After the exercises I feel ... |        |
|----------------|----------------------------------------------------|---------------------|----------|------|-----------|--------------------------------|--------|
| Day            | (Basic training, specific exercises, walking ....) | low                 | moderate | high |           | physical                       | mental |
| Monday         |                                                    |                     |          |      |           |                                |        |
|                |                                                    |                     |          |      |           |                                |        |
|                |                                                    |                     |          |      |           | 😊                              | 😊      |
|                |                                                    |                     |          |      |           | 😐                              | 😐      |
|                |                                                    |                     |          |      |           | 😞                              | 😞      |
| Comments ..... |                                                    |                     |          |      |           |                                |        |
| .....          |                                                    |                     |          |      |           |                                |        |
| .....          |                                                    |                     |          |      |           |                                |        |

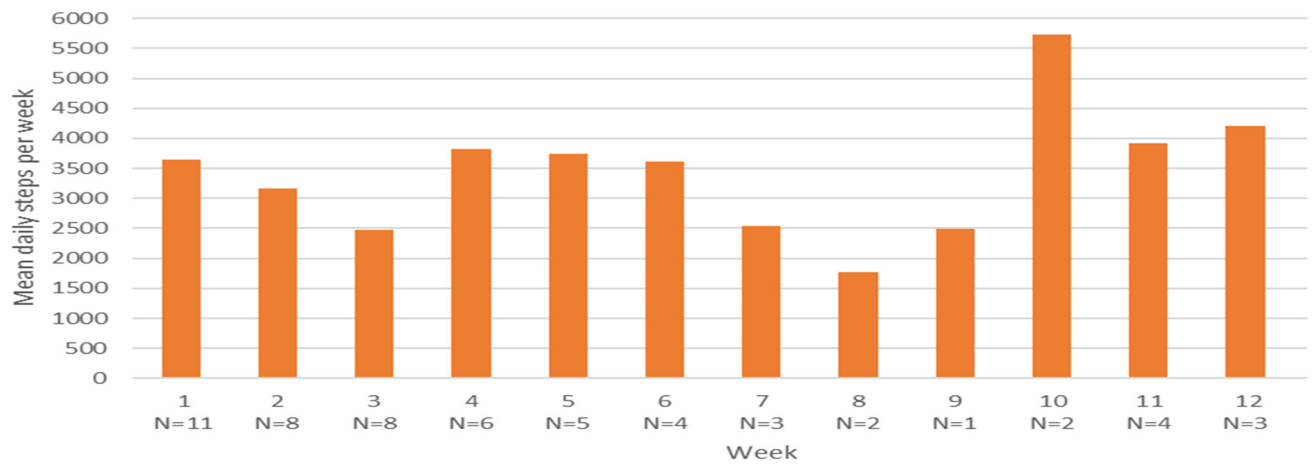

**Figure S3.** Mean daily steps per week of participants which used the pedometers more than 4 days for each given week.

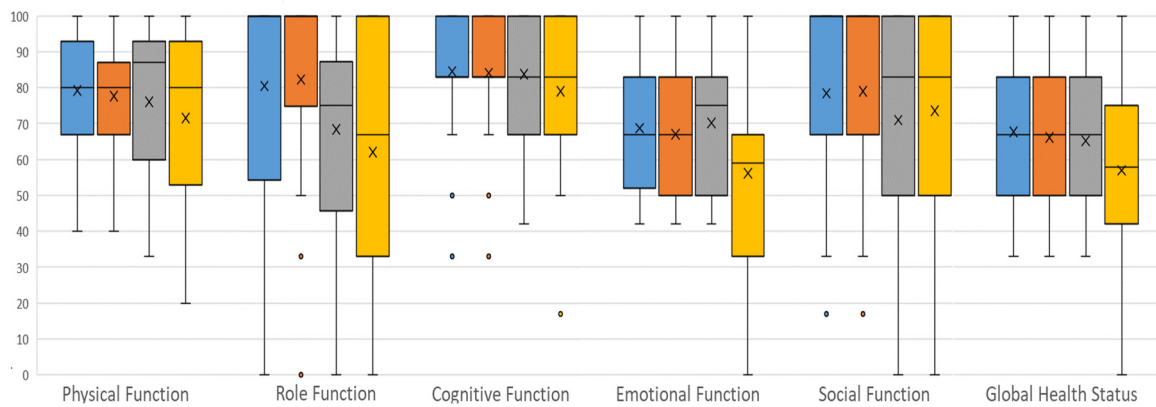

**Figure S4.** EORTC QLQ-C30 Functioning Scales (0-100 the higher the better) for baseline (n=24) (T0), baseline (n=19) (T0), post-assessments (n=19) (T1) and follow-up (n=19) (T2) depicted with boxplots (box 50%, whiskers 25% quartiles, Median=line, Mean =x).

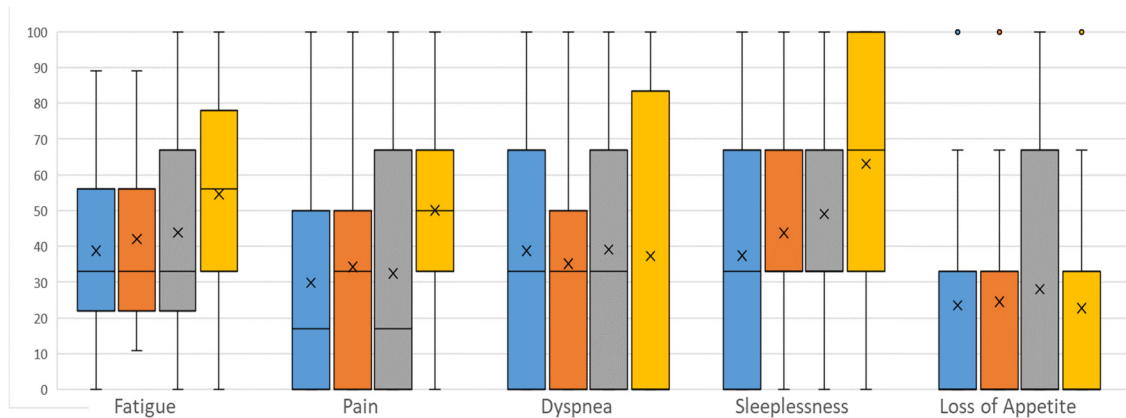

**Figure S5.** Selected Symptom Scales (EORTC QLQ-C30) (0-100 the lower the better) at baseline (n=24) (T0), baseline (n=19) (T0), post-assessments (n=19) (T1) and follow-up (n=19) (T2) depicted with boxplots (box 50%, whiskers 25% quartiles, Median=line, Mean =x).
