# Supplementary material for: Development and Evaluation of a Multimodal Supportive Intervention for Promoting Physical Function in Older Patients with Cancer
Source: Cancers (Basel). 2022 May 24;14(11):2599. doi: 10.3390/cancers14112599 (PMC9179325; doi:10.3390/cancers14112599)
Supplement: Supplementary file 1 [file cancers-14-02599-s001.zip]

Archive with 4 entries (4 files):
- supplementary material Box S1 basic training.pdf
- supplementary material Box S2 examples of specific exercises.pdf
- supplementary material Graphics.pdf
- supplementary material Tables_May 24.2022.pdf
